# Supplementary material
Source: HighWire-hosted journal article supplement (http://dmd.aspetjournals.org/highwire/filestream/73567/field_highwire_adjunct_files/0/87635SupplData.pdf)
Supplement: 87635SupplData.pdf [file 87635SupplData.pdf]

**Clinical Extrapolation of the Effects of Dolutegravir and Other HIV Integrase Inhibitors  
on Folate Transport Pathways**

Maciej J. Zamek-Gliszczynski, Xuexiang Zhang, Jennypher Mudunuru, Yewei Du, Jian-Lu  
Chen, Kunal S. Taskar, Jane Huang, Yong Huang, and Elizabeth H. Romach

GlaxoSmithKline, Collegeville, PA, USA (MJZ-G, JM), and Ware, UK (KST); BioIVT, Santa  
Clara, CA, USA (XZ, YD, J-LC, JH, YH); ViiV Healthcare, RTP, NC, USA (EHR)

## Supplemental Methods 1: LC-MS/MS bioanalytical method summary.

### Sample preparation

In PCFT assay, eight concentrations of the test article were applied to the apical side of columns 3 through 10 in a 96-well cell plate transfected with a control vector in Rows A to D, and PCFT in Rows E to H. At the end of 5 min incubation, 20  $\mu$ L samples were taken from the apical side and transferred to the corresponding wells in a 96-well sample plate preloaded with 180  $\mu$ L internal standard in 50% acetonitrile (acetonitrile:H<sub>2</sub>O=1:1). Samples were frozen at -80°C for later detection.

In RFC assay, eight concentrations of the test article were applied to the basal side of columns 3 through 10 in a 96-well cell plate transfected with a control vector in Rows A to D, and RFC in Rows E to H. At the end of 5 min incubation, 20  $\mu$ L samples were taken from the basal side and transferred to the corresponding wells in a 96-well sample plate preloaded with 180  $\mu$ L internal standard in 50% acetonitrile (acetonitrile:H<sub>2</sub>O=1:1). Samples were frozen at -80°C for later detection.

In FR $\alpha$  assay, eight concentrations of the test article were applied to both sides of columns 3 through 10 in a 96-well cell plate transfected with a control vector in Rows A to D, and FR $\alpha$  in Rows E to H. At the end of 120 min incubation, 20  $\mu$ L samples were taken from the apical side and basal side of Rows E-H and transferred to Rows A to D, and E to H, respectively, in a 96-well sample plate preloaded with 180  $\mu$ L internal standard in 50% acetonitrile (acetonitrile:H<sub>2</sub>O=1:1). Samples were frozen at -80°C for later detection. Rows A-D in the cell plate (cells transfected with a control vector) were not sampled.

### LC-MS/MS analytical conditions for dolutegravir, cabotegravir, bictegravir, elvitegravir, raltegravir, methotrexate, and valproic acid

#### 1. Equipment

|                        |                                                                                                                                            |
|------------------------|--------------------------------------------------------------------------------------------------------------------------------------------|
| LC model<br>(Shimadzu) | Shimadzu LC-20AD, and Shimadzu SIL-20A<br>Analyst 1.6.2. software for instrument control and data analysis<br>API4000 triple quadrupole MS |
| MS model<br>(AB Sciex) | Analyst 1.6.2. software for instrument control and data analysis                                                                           |

#### 2. LC Conditions

|                    |                                                                           |
|--------------------|---------------------------------------------------------------------------|
| Column type        | Kinetex Polar-C18, 2.6 $\mu$ m particle size, 3.0 x 50 mm                 |
| Eluent A           | 5% ACN in H <sub>2</sub> O, w/ 0.1% formic acid and 5mM ammonium formate  |
| Eluent B           | 95% ACN in H <sub>2</sub> O, w/ 0.1% formic acid and 5mM ammonium formate |
| Flow rate          | 800 $\mu$ L/min                                                           |
| Column temperature | Room temperature                                                          |
| Injection volume   | 2 $\mu$ L                                                                 |

| Gradient                | A (%) | B (%) |
|-------------------------|-------|-------|
| time (min)              |       |       |
| BIC, CAB, DOL, EVT, MTX |       |       |
| 0                       | 98    | 2     |
| 0.2                     | 60    | 40    |
| 0.4                     | 20    | 80    |
| 0.8                     | 0     | 100   |
| 1.2                     | 0     | 100   |
| 1.25                    | 98    | 2     |
| 2                       | 98    | 2     |
| RAL, VPA                |       |       |
| 0                       | 100   | 0     |
| 0.2                     | 98    | 2     |
| 0.4                     | 20    | 80    |
| 0.8                     | 0     | 100   |
| 1.2                     | 0     | 100   |
| 1.25                    | 100   | 0     |
| 2                       | 100   | 0     |

### 3. MS parameters

bictegravir, cabotegravir, dolutegravir, elvitegravir, and methotrexate:

| Ionization:               | ESI(+) |
|---------------------------|--------|
| Scan type                 | MRM    |
| Ionspray Voltage          | 4500 V |
| Ion Source gas 1          | 50 psi |
| Ion Source gas 2          | 50 psi |
| Curtain gas               | 20 psi |
| Temperature               | 500 °C |
| Resolution Q <sub>1</sub> | Unit   |
| Resolution Q <sub>3</sub> | Unit   |
| DP                        | 50     |
| EP                        | 10     |

raltegravir and valproic acid:

| Ionization:      | ESI(-) |
|------------------|--------|
| Scan type        | MRM    |
| Ionspray Voltage | 4500 V |
| Ion Source gas 1 | 50 psi |

|                           |        |
|---------------------------|--------|
| Ion Source gas 2          | 50 psi |
| Curtain gas               | 20 psi |
| Temperature               | 500 °C |
| Resolution Q <sub>1</sub> | Unit   |
| Resolution Q <sub>3</sub> | Unit   |
| DP                        | 50     |
| EP                        | 10     |

|                   | Q1 mass (Da) | Q3 mass (Da) | Dwell time (msec) | DP  | CE  | CXP |
|-------------------|--------------|--------------|-------------------|-----|-----|-----|
| bictegravir       | 450.2        | 289.1        | 150               | 116 | 39  | 18  |
| cabotegravir      | 406.3        | 127.0        | 150               | 106 | 37  | 10  |
| dolutegravir      | 420.2        | 277.2        | 150               | 111 | 35  | 16  |
| elvitegravir      | 448.2        | 430.2        | 150               | 81  | 29  | 12  |
| methotrexate      | 455.3        | 308.2        | 150               | 90  | 40  | 12  |
| IS_Carbutamide(+) | 270.0        | 156.2        | 150               | 50  | 25  | 12  |
| raltegravir       | 443.2        | 315.9        | 150               | -95 | -24 | -9  |
| valproic Acid     | 142.9        | 142.9        | 150               | -55 | -8  | -11 |
| IS_Carbutamide(-) | 269.9        | 171.0        | 150               | -40 | -20 | -15 |

Internal standard (IS): Carbutamide

Retention time(min.):

|                   |           |
|-------------------|-----------|
| bictegravir       | 1.32      |
| cabotegravir      | 1.29      |
| dolutegravir      | 1.30      |
| elvitegravir      | 1.45      |
| methotrexate      | 1.18      |
| raltegravir       | 1.34      |
| valproic acid     | 1.32      |
| IS_Cabutamide (+) | 1.26      |
| IS_Cabutamide (-) | 1.32/1.36 |

LOD for BIC, CAB, DUL, EVT, MTX, RAL                    0.5 ~ 1 nM

LOD for valproic acid                                            100 nM

Matrix: HBSS+50% Acetonitrile

**Supplemental Figure 2: Functional verification of optimized folate *in vitro* transport assays.**

PCFT transport of 10 nM [<sup>3</sup>H]-folic acid (A). RFC transport of 0.5 μM [<sup>3</sup>H]-methotrexate (B). FR $\alpha$ -mediated endocytosis of 50 nM [<sup>3</sup>H]-folic acid (C). Note all inhibitor concentrations and IC<sub>50</sub> values are nominal. Mean  $\pm$  S.D., n = 4.

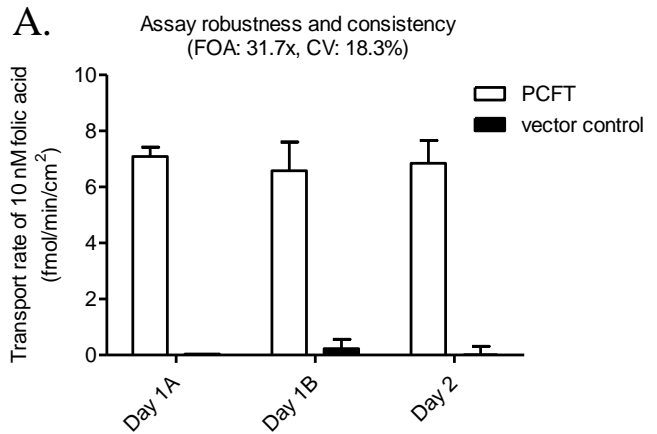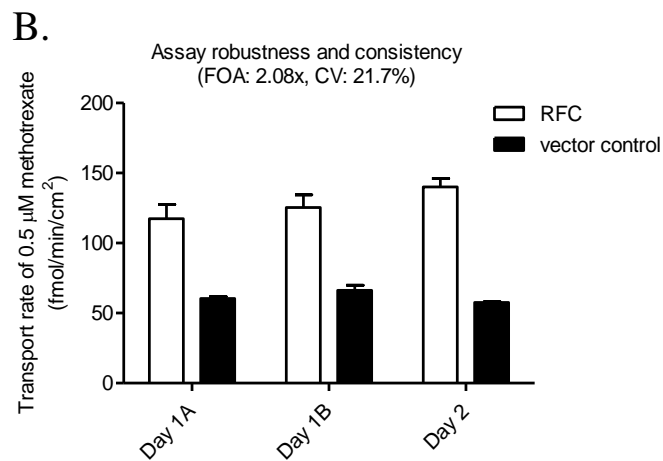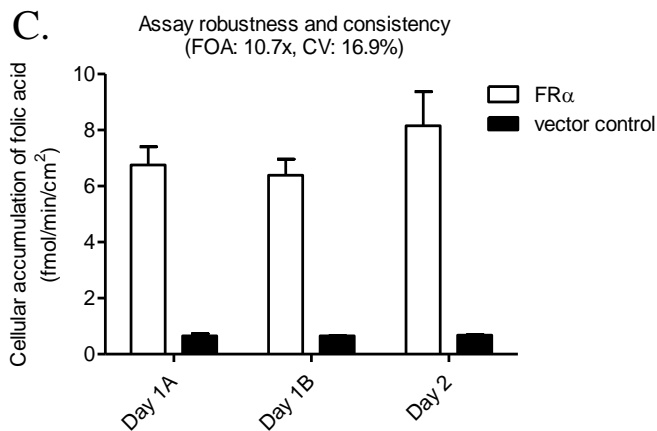

**Supplemental Table 3: Evaluation of cytotoxicity by lactate dehydrogenase (LDH) leakage.**

To evaluate the possibility that inhibition observed in the FR $\alpha$  endocytosis assays (longest incubation duration on both apical and basolateral sides) was an artifact of cytotoxicity, LDH release was investigated in FR $\alpha$ -expressing and control cells at the two highest test article concentrations. As this was the longest incubation of cells and from both sides, a negative cytotoxicity results in this assay was deemed adequate to address cytotoxicity in PFCT and RFC assays (35 min vs 2.5 h incubation and only from apical or basal side vs both). Only elvitegravir exhibited statistically significant >12.5% cytotoxicity in the FR $\alpha$ -expressing cells at the top two tested concentrations (Supplemental Table 3.1). However, elvitegravir cytotoxicity was not observed under the incubation conditions of the PCFT assay, where inhibition of this transporter was observed at the two highest elvitegravir concentrations, and which cannot be attributed to cytotoxicity (Supplemental Table 3.2).

**Supplemental Table 3.1. LDH release in vector control and FR $\alpha$ -expressing cells following incubation with test articles.**

| Treatment       | Concentration ( $\mu$ M) | Absorbance-Blank (FR $\alpha$ receptor) | Absorbance-Blank (vector control) | % Cytotoxicity (FR $\alpha$ receptor) | % Cytotoxicity (vector control) |
|-----------------|--------------------------|-----------------------------------------|-----------------------------------|---------------------------------------|---------------------------------|
| Vehicle         |                          | 641 $\pm$ 64                            | 1,005 $\pm$ 187                   | 0.0 $\pm$ 0.0                         | 0.0 $\pm$ 0.0                   |
| dolutegravir    | 15.9                     | 875 $\pm$ 128                           | 1,350 $\pm$ 102                   | 2.7 $\pm$ 1.5                         | 4.5 $\pm$ 1.4                   |
| dolutegravir    | 37.3                     | 924 $\pm$ 153                           | 1,036 $\pm$ 99                    | 3.3 $\pm$ 1.8                         | 0.4 $\pm$ 1.3                   |
| cabotegravir    | 11.6                     | 1,189 $\pm$ 204                         | 1,047 $\pm$ 242                   | 6.3 $\pm$ 2.4                         | 0.6 $\pm$ 3.2                   |
| cabotegravir    | 25.8                     | 1,033 $\pm$ 144                         | 1,125 $\pm$ 398                   | 4.5 $\pm$ 1.7                         | 1.6 $\pm$ 5.2                   |
| bictegravir     | 103                      | 1,691 $\pm$ 36                          | 1,495 $\pm$ 462                   | 12.1 $\pm$ 0.7                        | 6.4 $\pm$ 6.1                   |
| bictegravir     | 442                      | 1,479 $\pm$ 117                         | 1,462 $\pm$ 1,020                 | 9.7 $\pm$ 1.4                         | 5.9 $\pm$ 13.4                  |
| elvitegravir    | 4.18                     | 2,975 $\pm$ 474                         | 809 $\pm$ 193                     | 26.9 $\pm$ 5.6*                       | -2.6 $\pm$ 2.5                  |
| elvitegravir    | 27.6                     | 1,817 $\pm$ 233                         | 1,925 $\pm$ 682                   | 13.6 $\pm$ 2.8*                       | 12.1 $\pm$ 8.9                  |
| raltegravir     | 171                      | 1,738 $\pm$ 645                         | 916 $\pm$ 167                     | 12.7 $\pm$ 7.5                        | -1.2 $\pm$ 2.1                  |
| raltegravir     | 472                      | 1,134 $\pm$ 114                         | 1,028 $\pm$ 126                   | 5.7 $\pm$ 1.3                         | 0.3 $\pm$ 1.6                   |
| valproic acid   | 352                      | 1,150 $\pm$ 111                         | 1,031 $\pm$ 79                    | 5.9 $\pm$ 1.3                         | 0.3 $\pm$ 1.0                   |
| valproic acid   | 1,380                    | 1,192 $\pm$ 485                         | 7,626 $\pm$ 4,240                 | 6.5 $\pm$ 5.6                         | 86.9 $\pm$ 55.7                 |
| methotrexate    | 271                      | 717 $\pm$ 186                           | 710 $\pm$ 250                     | 0.9 $\pm$ 2.1                         | -3.9 $\pm$ 3.3                  |
| methotrexate    | 616                      | 1,200 $\pm$ 80                          | 1,177 $\pm$ 458                   | 6.4 $\pm$ 1.0                         | 2.3 $\pm$ 6.0                   |
| 1% Triton-X 100 |                          | 9,312 $\pm$ 393                         | 8,627 $\pm$ 592                   | 100 $\pm$ 6.4*                        | 100 $\pm$ 8.9*                  |

% of toxicity was calculated assuming vehicle was 0% and 1% Triton-X was 100%.

\* >12.5% cytotoxicity, which is significantly different from vehicle by t-test with Bonferroni's correction. Mean  $\pm$  S.D., n = 3.

**Supplemental Table 3.2. LDH release in vector control and PCFT-expressing cells after incubation with elvitegravir.**

| Treatment      | Concentration ( $\mu$ M) | Absorbance-Blank (PCFT) | Absorbance-Blank (vector control) | % Cytotoxicity (PCFT) | % Cytotoxicity (vector control) |
|----------------|--------------------------|-------------------------|-----------------------------------|-----------------------|---------------------------------|
| Vehicle        |                          | 1,547 $\pm$ 319         | 1,279 $\pm$ 160                   | 0.0 $\pm$ 0.0         | 0.0 $\pm$ 0.0                   |
| elvitegravir   | 8.24                     | 1,210 $\pm$ 217         | 1,968 $\pm$ 223                   | -3.9 $\pm$ 2.5        | 7.8 $\pm$ 2.5                   |
| elvitegravir   | 30.0                     | 701 $\pm$ 168           | 1,088 $\pm$ 155                   | -9.8 $\pm$ 1.9        | -2.2 $\pm$ 1.7                  |
| 1% Triton-X100 |                          | 10,140 $\pm$ 95         | 10,160 $\pm$ 125                  | 100 $\pm$ 1.5*        | 100 $\pm$ 1.9*                  |

% of toxicity was calculated assuming vehicle was 0% and 1% Triton-X was 100%.

\* >12.5% cytotoxicity, which is significantly different from vehicle by t-test with Bonferroni's correction. Mean  $\pm$  S.D., n = 3.
